# Supplementary material for: Genome Features and Secondary Metabolites Biosynthetic Potential of the Class Ktedonobacteria
Source: Front Microbiol. 2019 Apr 26;10:893. doi: 10.3389/fmicb.2019.00893 (PMC6497799; doi:10.3389/fmicb.2019.00893)
Supplement: TABLE S2 — CheckM estimation of the nine studied Ktedonobacteria strains. [file Table_2.XLSX]

## Sheet: CheckM
	Table S2 | CheckM estimation of the nine studied Ktedonobacteria strains.
	Name	Number of marker genes identified in each sequences				Completeness of each sequences (%)	Contamination of each sequences (%)	Strain heterogenity (%)
		0	1	2	3
	Dictyobacter aurantiacus S27T
	S27_all contigs	0	93	11	0	100	3.29	54.55
	S27_linear contig1	1	102	1	0	98.28	1.72	0
	S27_linear contig2 ("putative megaplasmid")	93	11	0	0	3.29	0	0
	Ktedonobacterales bacterium Uno16
	Uno16_all contigs	0	97	6	1	100	2.82	11.11
	Uno16_linear contig1	1	102	1	0	98.28	1.72	0
	Uno16_linear contig2 ("putative megaplasmid")	101	3	0	0	2.04	0	0
	Ktedonobacterales bacterium Uno3
	Uno3_all contigs	1	98	5	0	98.28	2.35	0
	Uno3_circular contig1	1	102	1	0	98.28	1.72	0
	Uno3_circular contig2 ("putative megaplasmid")	100	4	0	0	0.63	0	0
	Ktedonobacter racemifer SOSP1-21T
	SOSP1-21_all contigs	0	96	8	0	100	2.82	62.5
	SOSP1-21_contig1	40	64	0	0	43.1	0	0
	SOSP1-21_contig2	68	36	0	0	50	0	0
	SOSP1-21_contig3	98	6	0	0	0.94	0	0
	SOSP1-21_contig4	101	3	0	0	3.61	0	0
	SOSP1-21_contig5	102	2	0	0	3.45	0	0
	SOSP1-21_contig6	104	0	0	0	0	0	0
	SOSP1-21_contig7	104	0	0	0	0	0	0
	SOSP1-21_contig8	104	0	0	0	0	0	0
	SOSP1-21_contig9	103	1	0	0	1.72	0	0
	SOSP1-21_contig10	104	0	0	0	0	0	0
	Thermosporothrix hazakensis SK20-1T	1	91	12	0	98.28	3.45	0
	Thermosporothrix hazakensis COM3	1	91	12	0	98.28	3.45	0
	Thermogemmatispora onikobenesis ONI-1T	2	102	0	0	98.98	0	0
	Thermogemmatispora carboxidivorans PM5T	2	98	4	0	98.98	0.63	0
	Thermogemmatispora sp. A3-2	1	103	0	0	99.14	0	0
	Maker lineage: domain_Bacteria
	Number of reference genomes: 5449
	Number of reference markers: 104
	Number od reference maker sets: 58
