# Supplementary material for: Genome Features and Secondary Metabolites Biosynthetic Potential of the Class Ktedonobacteria
Source: Front Microbiol. 2019 Apr 26;10:893. doi: 10.3389/fmicb.2019.00893 (PMC6497799; doi:10.3389/fmicb.2019.00893)
Supplement: TABLE S3 — Similarities of multiple 16S ribosomal RNA operons within the nine studied Ktedonobacteria strains. [file Table_3.XLSX]

## Sheet: Sheet1
	Table S3 | Similarities of multiple 16S ribosomal RNA Operons within the nine studied Ktedonobacteria strains.
	Dictyobacter aurantiacus S27T	1	2	3	4	5	6	7	8	9
	contig1 16S rRNA gene 1	100
	contig1 16S rRNA gene 2	99.25	100
	contig1 16S rRNA gene 3	99.25	98.78	100
	contig1 16S rRNA gene 4	99.32	98.85	99.53	100
	contig1 16S rRNA gene 5	99.19	98.85	99.93	99.59	100
	contig1 16S rRNA gene 6	99.12	98.78	99.19	98.71	99.12	100
	contig1 16S rRNA gene 7	99.19	99.39	99.12	98.78	99.05	98.85	100
	contig2 16S rRNA gene 8	98.64	99.12	99.12	98.78	99.05	99.25	99.05	100
	contig2 16S rRNA gene 9	99.39	99.32	98.78	98.98	98.71	98.51	99.53	98.85	100
	Ktedonobacterales bacterium Uno16	1	2	3	4	5	6	7	8	9
	contig1 16S rRNA gene 1	100
	contig1 16S rRNA gene 2	99.46	100
	contig1 16S rRNA gene 3	99.66	99.39	100
	contig1 16S rRNA gene 4	99.46	99.19	99.39	100
	contig1 16S rRNA gene 5	99.73	99.19	99.53	99.6	100
	contig1 16S rRNA gene 6	99.06	99.26	98.99	98.72	98.79	100
	contig1 16S rRNA gene 7	99.06	98.92	98.99	99.06	98.98	99.53	100
	contig2 16S rRNA gene 8	99.6	99.6	99.66	99.33	99.33	99.19	99.06	100
	contig2 16S rRNA gene 9	99.53	99.53	99.6	99.26	99.26	99.06	99.12	99.66	100
	Ktedonobacterales bacterium Uno16	1	2	3	4	5	6	7	8	9
	contig1 16S rRNA gene 1	100
	contig1 16S rRNA gene 2	99.73	100
	contig1 16S rRNA gene 3	99.86	99.59	100
	contig1 16S rRNA gene 4	99.73	99.46	99.86	100
	contig1 16S rRNA gene 5	99.59	99.32	99.59	99.73	100
	contig1 16S rRNA gene 6	100	99.73	99.86	99.73	99.59	100
	contig1 16S rRNA gene 7	99.39	99.39	99.25	99.39	99.39	99.39	100
	contig1 16S rRNA gene 8	99.73	99.46	99.66	99.8	99.66	99.73	99.39	100
	contig2 16S rRNA gene 9	99.53	99.25	99.39	99.53	99.53	99.53	99.73	99.53	100
	Ktedonobacter racemifer SOSP1-21T	1	2	3	4	5	6	7	8
	contig 1 16S rRNA gene 1	100
	contig 1 16S rRNA gene 2	99.53	100
	contig 1 16S rRNA gene 3	99.86	99.66	100
	contig 2 16S rRNA gene 4	99.39	99.59	99.39	100
	contig 2 16S rRNA gene 5	100	99.53	99.86	99.39	100
	contig 3 16S rRNA gene 6	99.59	99.8	99.59	99.53	99.59	100
	contig 4 16S rRNA gene 7	99.59	99.8	99.53	99.53	99.59	99.8	100
	contig 4 16S rRNA gene 8	99.73	99.73	99.59	99.66	99.73	99.86	99.86	100
	Thermosporothrix hazakensis SK20-1T	1	2	3	4	5
	16S rRNA gene 1	100
	16S rRNA gene 2	99.19	100
	16S rRNA gene 3	99.26	99.66	100
	16S rRNA gene 4	99.26	99.66	99.59	100
	16S rRNA gene 5	99.19	99.53	100	99.59	100
	Thermosporothrix hazakensis COM3	1	2	3	4	5
	16S rRNA gene 1	100
	16S rRNA gene 2	99.66	100
	16S rRNA gene 3	99.66	99.73	100
	16S rRNA gene 4	99.86	99.66	99.66	100
	16S rRNA gene 5	99.73	99.8	99.93	99.73	100
	Thermogemmatispora carboxydivorans PM5T	1	2	3
	16S rRNA gene 1	100
	16S rRNA gene 2	99.67	100
	16S rRNA gene 3	99.74	99.93	100
	Thermogemmatispora sp. A3-2	1	2	3
	16S rRNA gene 1	100
	16S rRNA gene 2	99.87	100
	16S rRNA gene 3	99.74	99.87	100
